# Supplementary material for: Parallel evolution of senescence in annual fishes in response to extrinsic mortality
Source: PubMed Central journal article supplement (PMC3623659; doi:10.1186/1471-2148-13-77), 2013-04-03
Supplement: 1471-2148-13-77-S10.pdf [file 1471-2148-13-77-S10.pdf]

**Table S10 Microsatellite polymorphisms in the four studied species** - Microsatellites were amplified using PCR on genomic DNA and microsatellites ID are described in Valenzano et al. (2009). For each of the two alleles, the length of the amplified fragment is reported. For homozygous loci, both these values are identical. One individual for each species was analyzed, n.a. indicates no amplification.

| microsatellite ID <sup>1</sup> |         | amplicon size         |                   |                    |                    |
|--------------------------------|---------|-----------------------|-------------------|--------------------|--------------------|
|                                |         | <i>N. furzeri</i> GRZ | <i>N. kuhntae</i> | <i>N. rachovii</i> | <i>N. pienaari</i> |
| FLI001                         | allele1 | 189                   | 160               | 162                | 161                |
|                                | allele2 | 189                   | 162               | 162                | 176                |
| FLI006                         | allele1 | 298                   | 303               | 289                | 359                |
|                                | allele2 | 298                   | 303               | 293                | 359                |
| FLI008                         | allele1 | 214                   | n.a.              | n.a.               | n.a.               |
|                                | allele2 | 214                   | n.a.              | n.a.               | n.a.               |
| FLI009                         | allele1 | 192                   | 171               | 233                | 251                |
|                                | allele2 | 192                   | 185               | 233                | 251                |
| FLI010                         | allele1 | 211                   | 189               | 205                | 187                |
|                                | allele2 | 211                   | 215               | 269                | 269                |
| FLI012                         | allele1 | 203                   | n.a.              | n.a.               | n.a.               |
|                                | allele2 | 203                   | n.a.              | n.a.               | n.a.               |
| FLI013                         | allele1 | 240                   | 418               | 388                | 420                |
|                                | allele2 | 240                   | 418               | 418                | 420                |
| FLI015                         | allele1 | 245                   | 275               | 313                | 286                |
|                                | allele2 | 245                   | 357               | 357                | 296                |
| FLI016                         | allele1 | 244                   | 257               | 249                | 235                |
|                                | allele2 | 244                   | 257               | 257                | 235                |
| FLI017                         | allele1 | 263                   | 359               | 289                | 303                |
|                                | allele2 | 263                   | 359               | 293                | 303                |
| FLI019                         | allele1 | 259                   | 198               | 210                | 190                |
|                                | allele2 | 259                   | 198               | 226                | 190                |
| FLI020                         | allele1 | 248                   | n.a.              | n.a.               | n.a.               |
|                                | allele2 | 248                   | n.a.              | n.a.               | n.a.               |
| FLI021                         | allele1 | 292                   | 287               | 297                | 271                |
|                                | allele2 | 292                   | 287               | 309                | 315                |
| FLI024                         | allele1 | 250                   | 248               | 292                | 316                |
|                                | allele2 | 250                   | 248               | 298                | 316                |
| FLI026                         | allele1 | 187                   | n.a.              | n.a.               | n.a.               |
|                                | allele2 | 187                   | n.a.              | n.a.               | n.a.               |
| FLI027                         | allele1 | 237                   | 188               | 202                | 314                |
|                                | allele2 | 237                   | 220               | 202                | 314                |
| FLI028                         | allele1 | 244                   | 288               | n.a.               | n.a.               |
|                                | allele2 | 244                   | 296               | n.a.               | n.a.               |
| FLI030                         | allele1 | 188                   | 163               | 167                | 185                |
|                                | allele2 | 188                   | 163               | 173                | 197                |
| FLI033                         | allele1 | 232                   | 242               | 210                | 218                |
|                                | allele2 | 232                   | 246               | 210                | 218                |
| FLI036                         | allele1 | 346                   | 330               | 384                | 378                |
|                                | allele2 | 346                   | 330               | 396                | 378                |
| FLI041                         | allele1 | 205                   | 251               | n.a.               | 245                |
|                                | allele2 | 205                   | 251               | n.a.               | 245                |
| FLI045                         | allele1 | 388                   | 370               | 378                | 368                |
|                                | allele2 | 388                   | 370               | 388                | 368                |
| FLI046                         | allele1 | 563                   | n.a.              | n.a.               | n.a.               |
|                                | allele2 | 563                   | n.a.              | n.a.               | n.a.               |
| FLI049                         | allele1 | 341                   | 295               | 285                | 293                |
|                                | allele2 | 341                   | 295               | 289                | 295                |
| FLI050                         | allele1 | 395                   | n.a.              | n.a.               | n.a.               |
|                                | allele2 | 395                   | n.a.              | n.a.               | n.a.               |
| FLI052                         | allele1 | 348                   | 436               | 405                | 446                |
|                                | allele2 | 348                   | 436               | 408                | 462                |
| FLI053                         | allele1 | 288                   | 362               | n.a.               | 382                |

|        |         |     |      |      |      |
|--------|---------|-----|------|------|------|
|        | allele2 | 288 | 362  | n.a. | 382  |
| FLI055 | allele1 | 227 | n.a. | n.a. | n.a. |
|        | allele2 | 227 | n.a. | n.a. | n.a. |
| FLI060 | allele1 | 434 | 415  | 363  | 383  |
|        | allele2 | 434 | 415  | 381  | 393  |
| FLI062 | allele1 | 414 | 391  | 389  | 363  |
|        | allele2 | 414 | 391  | 389  | 363  |
| FLI063 | allele1 | 432 | n.a. | n.a. | n.a. |
|        | allele2 | 432 | n.a. | n.a. | n.a. |
| FLI067 | allele1 | 358 | 398  | 432  | 398  |
|        | allele2 | 358 | 398  | 432  | 398  |
| FLI069 | allele1 | 378 | 485  | 355  | 425  |
|        | allele2 | 378 | 485  | 411  | 475  |
| FLI070 | allele1 | 318 | 359  | 359  | 365  |
|        | allele2 | 318 | 359  | 359  | 365  |
| FLI071 | allele1 | 503 | n.a. | n.a. | n.a. |
|        | allele2 | 503 | n.a. | n.a. | n.a. |
| FLI073 | allele1 | 301 | 309  | 333  | 291  |
|        | allele2 | 301 | 309  | 341  | 291  |
| FLI076 | allele1 | 469 | n.a. | n.a. | n.a. |
|        | allele2 | 469 | n.a. | n.a. | n.a. |
| FLI078 | allele1 | 283 | 247  | 252  | 255  |
|        | allele2 | 283 | 250  | 252  | 262  |
| FLI080 | allele1 | 340 | 299  | 229  | 283  |
|        | allele2 | 340 | 407  | 229  | 283  |
| FLI090 | allele1 | 300 | 296  | 316  | 334  |
|        | allele2 | 300 | 316  | 316  | 334  |
| FLI093 | allele1 | 409 | 417  | 413  | 413  |
|        | allele2 | 409 | 417  | 423  | 417  |
| FLI095 | allele1 | 491 | 418  | 402  | 440  |
|        | allele2 | 491 | 476  | 402  | 528  |
| FLI096 | allele1 | 302 | 329  | 275  | 313  |
|        | allele2 | 302 | 329  | 275  | 313  |
| FLI097 | allele1 | 401 | 509  | 383  | 395  |
|        | allele2 | 401 | 513  | 383  | 425  |
| FLI102 | allele1 | 461 | 479  | 453  | 491  |
|        | allele2 | 461 | 491  | 453  | 491  |
| FLI104 | allele1 | 264 | 307  | 297  | 299  |
|        | allele2 | 264 | 347  | 357  | 299  |
| FLI107 | allele1 | 460 | 438  | 438  | 442  |
|        | allele2 | 460 | 442  | 460  | 442  |
| FLI108 | allele1 | 280 | 240  | 336  | 300  |
|        | allele2 | 280 | 240  | 336  | 300  |
| FLI110 | allele1 | 210 | 200  | 188  | 198  |
|        | allele2 | 210 | 230  | 204  | 228  |
| FLI113 | allele1 | 514 | 504  | 300  | 300  |
|        | allele2 | 514 | 504  | 300  | 300  |
| FLI121 | allele1 | 406 | 416  | 410  | 416  |
|        | allele2 | 406 | 416  | 410  | 416  |
| FLI123 | allele1 | 255 | 236  | 238  | 246  |
|        | allele2 | 255 | 242  | 238  | 246  |
| FLI124 | allele1 | 540 | 547  | 577  | 577  |
|        | allele2 | 540 | 555  | 577  | 577  |
| FLI128 | allele1 | 417 | 378  | 382  | 448  |
|        | allele2 | 417 | 378  | 382  | 448  |
| FLI132 | allele1 | 433 | n.a. | n.a. | n.a. |

|        |         |     |      |      |      |
|--------|---------|-----|------|------|------|
|        | allele2 | 433 | n.a. | n.a. | n.a. |
| FLI134 | allele1 | 303 | 211  | 267  | 211  |
|        | allele2 | 303 | 211  | 267  | 295  |
| SU001  | allele1 | 207 | 211  | 211  | 257  |
|        | allele2 | 207 | 211  | 233  | 257  |
| SU002  | allele1 | 250 | 186  | 164  | 240  |
|        | allele2 | 250 | 186  | 250  | 250  |
| SU007  | allele1 | 181 | 219  | 205  | 205  |
|        | allele2 | 191 | 255  | 225  | 219  |
| SU008  | allele1 | 253 | 243  | 169  | 163  |
|        | allele2 | 253 | 243  | 199  | 243  |
| SU010  | allele1 | 199 | 167  | 243  | 215  |
|        | allele2 | 251 | 195  | 243  | 243  |
| SU012  | allele1 | 211 | 199  | 173  | 189  |
|        | allele2 | 211 | 209  | 221  | 217  |
| SU014  | allele1 | 223 | 228  | 218  | 228  |
|        | allele2 | 223 | 228  | 218  | 236  |
| SU017  | allele1 | 263 | 168  | 168  | 298  |
|        | allele2 | 263 | 168  | 168  | 318  |
| SU027  | allele1 | 226 | 183  | 161  | 163  |
|        | allele2 | 226 | 231  | 163  | 211  |
| SU031  | allele1 | 123 | 211  | 165  | 171  |
|        | allele2 | 123 | 211  | 179  | 203  |
| SU032  | allele1 | 256 | 268  | 248  | 276  |
|        | allele2 | 256 | 268  | 254  | 294  |
| SU033  | allele1 | 230 | 163  | 209  | 159  |
|        | allele2 | 230 | 209  | 209  | 187  |
| SU034  | allele1 | 318 | 222  | 248  | 214  |
|        | allele2 | 318 | 240  | 252  | 214  |
| SU037  | allele1 | 331 | 216  | 222  | 234  |
|        | allele2 | 331 | 216  | 222  | 234  |
| SU038  | allele1 | 118 | 219  | 117  | 219  |
|        | allele2 | 118 | 219  | 117  | 225  |
| SU039  | allele1 | 203 | 228  | 178  | 184  |
|        | allele2 | 203 | 228  | 178  | 184  |
| SU040  | allele1 | 171 | 117  | 117  | 169  |
|        | allele2 | 171 | 117  | 117  | 169  |
| SU046  | allele1 | 210 | 199  | 221  | 181  |
|        | allele2 | 210 | 219  | 221  | 209  |
| SU054  | allele1 | 156 | 138  | 122  | 126  |
|        | allele2 | 156 | 152  | 230  | 126  |
| SU055  | allele1 | 192 | 203  | 241  | 185  |
|        | allele2 | 192 | 209  | 241  | 197  |
| SU056  | allele1 | 188 | 196  | 160  | 164  |
|        | allele2 | 188 | 204  | 160  | 164  |
| SU058  | allele1 | 209 | 176  | 223  | n.a. |
|        | allele2 | 209 | 176  | 267  | n.a. |
| SU059  | allele1 | 222 | 139  | 157  | 153  |
|        | allele2 | 222 | 199  | 223  | 197  |
| SU061  | allele1 | 242 | 317  | 315  | 305  |
|        | allele2 | 242 | 333  | 327  | 317  |
| SU062  | allele1 | 250 | 279  | 296  | 307  |
|        | allele2 | 250 | 279  | 296  | 307  |
| SU064  | allele1 | 237 | 248  | 224  | 190  |
|        | allele2 | 237 | 248  | 232  | 196  |
| SU065  | allele1 | 181 | 203  | 205  | 205  |

|       |         |     |      |      |      |
|-------|---------|-----|------|------|------|
|       | allele2 | 181 | 205  | 205  | 211  |
| SU067 | allele1 | 207 | 191  | 205  | 183  |
|       | allele2 | 207 | 191  | 205  | 205  |
| SU069 | allele1 | 252 | 251  | 248  | 251  |
|       | allele2 | 252 | 251  | 248  | 251  |
| SU071 | allele1 | 258 | 361  | n.a. | 373  |
|       | allele2 | 258 | 361  | n.a. | 373  |
| SU072 | allele1 | 209 | 226  | 368  | 206  |
|       | allele2 | 209 | 226  | 368  | 230  |
| SU073 | allele1 | 273 | n.a. | 264  | 250  |
|       | allele2 | 273 | n.a. | 264  | 250  |
| SU075 | allele1 | 388 | 410  | 410  | 310  |
|       | allele2 | 388 | 410  | 410  | 316  |
| SU077 | allele1 | 194 | 222  | 222  | 276  |
|       | allele2 | 194 | 222  | 290  | 276  |
| SU078 | allele1 | 190 | 186  | 180  | 178  |
|       | allele2 | 190 | 188  | 180  | 178  |
| SU079 | allele1 | 306 | 328  | 298  | 280  |
|       | allele2 | 306 | 332  | 298  | 280  |
| SU080 | allele1 | 179 | n.a. | n.a. | n.a. |
|       | allele2 | 179 | n.a. | n.a. | n.a. |
| SU081 | allele1 | 191 | 186  | 180  | 178  |
|       | allele2 | 191 | 188  | 180  | 178  |
| SU082 | allele1 | 263 | 218  | 236  | 218  |
|       | allele2 | 263 | 276  | 236  | 266  |
| SU083 | allele1 | 222 | 235  | 223  | 205  |
|       | allele2 | 222 | 235  | 223  | 205  |
