# Supplementary material for: Parallel evolution of senescence in annual fishes in response to extrinsic mortality
Source: PubMed Central journal article supplement (PMC3623659; doi:10.1186/1471-2148-13-77), 2013-04-03
Supplement: 1471-2148-13-77-S11.pdf [file 1471-2148-13-77-S11.pdf]

**Table S11 Sequence divergence between *N. furzeri* and *N. kuhntae* measured at 115 loci -**

Column 1 reports the gene name, Column 2 reports the length of the coding sequence in *N. furzeri*, column 3 reports the length of the alignment between the two ortholog sequences, column 4 reports the percentage of the *N. furzeri* coding sequence covered by the alignment, column 5 reports the ID of the *N. furzeri* transcript, column 6 reports the ID of the *N. kunthae* genomic contig, column 7 reports the number of sites of possible non-synonymous substitution, column 8 reports the frequency of non-synonymous substitutions per site, column 9 reports the number of sites of possible synonymous substitution (dN), column 10 reports the frequency of synonymous substitutions per site (dS), column 10 reports the dN/dS ratio, column 11 reports the percentage of aminoacidic sequence identity in the alignment, column 12 reports the percentage of nucleotide sequence identity in the alignment, column 12 reports the number of non-synonymous sequence variations and column 13 the number of synonymous sequence variations. The last two rows report the median of all columns and the total for columns 2, 3, 6, 8, 13 and 14.

| Gene             | length [bp] cds in Nofu | length nt-ali seq1 to seq2 | [%]  | GRZ transcript ID: Nofu_GRZ_cDN A_3_ | Noku genom contig    | N = avg no. non-syn sites | dN (Ka) | S = avg no. syn sites | dS (Ks) | dN/dS   | prot_ID [%] | cDNA_ID [%] | # non-syn var | # syn var |
|------------------|-------------------------|----------------------------|------|--------------------------------------|----------------------|---------------------------|---------|-----------------------|---------|---------|-------------|-------------|---------------|-----------|
| ADAMTS12         | 4668                    | 316                        | 6.8  | 1250                                 | Nku-G-d-27c01.f1     | 211.9                     | 0.0000  | 103.1                 | 0.0102  | 0.00100 | 100         | 99.68       |               | 1         |
| KIAA1614         | 2928                    | 243                        | 8.3  | 4622                                 | Nku-G-d-06g10.f1     | 168.8                     | 0.0001  | 74.2                  | 0.0557  | 0.00100 | 100         | 98.35       | 0             | 4         |
| IKBKB            | 2214                    | 548                        | 24.8 | 176555                               | Nku-G-d-05c09.f1     | 437.4                     | 0.0000  | 108.6                 | 0.0186  | 0.00100 | 100         | 99.63       | 0             | 2         |
| LLGL2            | 3012                    | 212                        | 7.0  | 160453                               | Nku-G-d-26e03.r1     | 156.6                     | 0.0000  | 53.4                  | 0.0392  | 0.00100 | 100         | 99.05       | 0             | 2         |
| SPTBN2           | 6882                    | 491                        | 7.1  | 207523                               | Nku-G-d-22h11.r1     | 325.1                     | 0.0000  | 163.9                 | 0.0058  | 0.00100 | 100         | 99.8        | 0             | 1         |
| ANKHA            | 1479                    | 395                        | 26.7 | 10472                                | Nku-G-d-04g10.f1     | 268.2                     | 0.0000  | 124.8                 | 0.0420  | 0.00100 | 100         | 98.73       | 0             | 5         |
| RBMX2            | 846                     | 254                        | 30.0 | 195428                               | Nku-G-d-49d02.f1     | 197.6                     | 0.0000  | 54.4                  | 0.0182  | 0.00100 | 100         | 99.6        | 0             | 1         |
| TXNL1            | 867                     | 350                        | 40.4 | 34863                                | Nku-G-d-01h03.f1     | 265.5                     | 0.0000  | 82.5                  | 0.0375  | 0.00100 | 100         | 99.14       | 0             | 3         |
| DDX47 (1 OF 2)   | 1425                    | 262                        | 18.4 | 34410                                | Nku-G-d-16h04.r1     | 181.7                     | 0.0000  | 79.3                  | 0.0379  | 0.00100 | 100         | 98.85       | 0             | 3         |
| RPRD2 (1 OF 2)   | 2139                    | 420                        | 19.6 | 182952                               | Nku-G-d-57d12.f1     | 272.5                     | 0.0000  | 147.5                 | 0.0147  | 0.00100 | 100         | 99.52       | 0             | 2         |
| PSMC6            | 1182                    | 202                        | 17.1 | 7763                                 | Nku-G-d-37b07.f1     | 151.0                     | 0.0000  | 47.0                  | 0.0226  | 0.00100 | 98.51       | 98.51       | 0             | 1         |
| KDRL             | 3900                    | 252                        | 6.5  | 159935                               | Nku-G-d-18f02.r1     | 194.4                     | 0.0001  | 57.6                  | 0.0569  | 0.00100 | 100         | 98.81       | 0             | 3         |
| CHD4 (2 OF 2)    | 5871                    | 393                        | 6.7  | 159809                               | Nku-G-d-11c07.f1     | 296.5                     | 0.0000  | 96.5                  | 0.0332  | 0.00100 | 100         | 99.24       | 0             | 3         |
| DLG5             | 6144                    | 572                        | 9.3  | 207672                               | Nku-G-d-62c12.f1     | 396.2                     | 0.0000  | 173.8                 | 0.0117  | 0.00100 | 100         | 99.65       | 0             | 2         |
| AGPS             | 1920                    | 163                        | 8.5  | 7906                                 | Nku-G-d-56a07.r1     | 106.0                     | 0.0000  | 56.0                  | 0.0388  | 0.00100 | 100         | 98.77       | 0             | 2         |
| EVPL (1 OF 2)    | 11169                   | 302                        | 2.7  | 179063                               | Nku-G-d-59b06.r1     | 237.1                     | 0.0000  | 62.9                  | 0.0165  | 0.00100 | 100         | 99.67       | 0             | 1         |
| Sl:CH211-66G24   | 3321                    | 248                        | 7.5  | 1798                                 | Nku-G-d-46g09.f1     | 193.5                     | 0.0001  | 52.5                  | 0.0598  | 0.00100 | 100         | 98.78       | 0             | 3         |
| TARSL2           | 2430                    | 190                        | 7.8  | 10756                                | Nku-G-d-01e09.r1     | 134.9                     | 0.0000  | 54.1                  | 0.0185  | 0.00100 | 100         | 99.47       | 0             | 1         |
| MAST1 (1 OF 2)   | 7035                    | 241                        | 3.4  | 5653                                 | Nku-G-d-01b02.r1     | 174.2                     | 0.0000  | 65.8                  | 0.0000  | 0.00100 | 100         | 100         | 0             | 0         |
| MYO16            | 5880                    | 202                        | 3.4  | 175664                               | Nku-G-d-19a04.f1     | 128.4                     | 0.0000  | 72.6                  | 0.0133  | 0.00100 | 100         | 99.5        | 0             | 1         |
| XPR1 (2 OF 2)    | 2073                    | 306                        | 14.8 | 1498                                 | Nku-G-d-35h05.f1     | 250.0                     | 0.0000  | 56.0                  | 0.0375  | 0.00100 | 100         | 99.35       | 0             | 2         |
| BMP1A            | 2010                    | 345                        | 17.2 | 4584                                 | Nku-G-d-18g05.r1     | 280.4                     | 0.0000  | 64.6                  | 0.0480  | 0.00100 | 100         | 99.13       | 0             | 3         |
| CNOT2 (2 OF 2)   | 1608                    | 254                        | 15.8 | 9641                                 | Nku-G-d-26d05.f1     | 167.0                     | 0.0000  | 85.0                  | 0.0120  | 0.00100 | 100         | 99.6        | 0             | 1         |
| CYFIP2           | 3720                    | 353                        | 9.5  | 4139                                 | Nku-G-d-14c12.f1     | 248.1                     | 0.0000  | 102.9                 | 0.0102  | 0.00100 | 100         | 99.72       | 0             | 1         |
| FPGS             | 1716                    | 187                        | 10.9 | 208283                               | Nku-G-d-47c10.f1     | 140.2                     | 0.0000  | 45.8                  | 0.0209  | 0.00100 | 100         | 99.46       | 0             | 1         |
| TNFAIP3          | 2538                    | 297                        | 11.7 | 0185099-cds                          | Nku-G-d-15b04.r1-cds | 201.6                     | 0.0000  | 92.4                  | 0.0342  | 0.00100 | 100         | 98.98       | 0             | 3         |
| CDK20            | 2043                    | 346                        | 16.9 | 161411                               | Nku-G-d-01g08.r1     | 274.8                     | 0.0000  | 70.2                  | 0.0147  | 0.00100 | 100         | 99.71       | 0             | 1         |
| GLT25D2          | 1857                    | 338                        | 18.2 | 193756                               | Nku-G-d-11e11.r1     | 221.1                     | 0.0000  | 114.9                 | 0.0179  | 0.00100 | 100         | 99.4        | 0             | 2         |
| TFR1A            | 2271                    | 402                        | 17.7 | 4579                                 | Nku-G-d-23c02.f1     | 321.4                     | 0.0000  | 80.6                  | 0.0399  | 0.00100 | 100         | 99.25       | 0             | 3         |
| HELLS            | 2565                    | 465                        | 18.1 | 8615                                 | Nku-G-d-01a10.r1     | 379.4                     | 0.0001  | 85.6                  | 0.0607  | 0.00100 | 100         | 98.92       | 0             | 5         |
| APC              | 7590                    | 1,142                      | 15.0 | 175577                               | Nku-G-d-02d08.f1     | 874.0                     | 0.0000  | 266.0                 | 0.0302  | 0.00100 | 100         | 99.3        | 0             | 8         |
| UFSP2            | 1383                    | 458                        | 33.1 | 193578                               | Nku-G-d-12a05.r1     | 347.1                     | 0.0000  | 108.9                 | 0.0194  | 0.00100 | 100         | 99.56       | 0             | 2         |
| DIRAS1 (2 OF 2)  | 624                     | 302                        | 48.4 | 184264                               | Nku-G-d-31h06.r1     | 253.3                     | 0.0000  | 46.7                  | 0.0468  | 0.00100 | 100         | 99.33       | 0             | 2         |
| GRID2IP (1 OF 2) | 1959                    | 255                        | 13.0 | 706                                  | Nku-G-d-21a04.r1     | 205.7                     | 0.0000  | 49.3                  | 0.0209  | 0.00100 | 100         | 99.61       | 0             | 1         |
| ZNF365           | 1326                    | 523                        | 39.4 | 193079                               | Nku-G-d-25e02.f1     | 419.1                     | 0.0000  | 102.9                 | 0.0410  | 0.00100 | 100         | 99.23       | 0             | 4         |
| LIMD2            | 342                     | 291                        | 85.1 | 53724                                | Nku-G-d-60b11.r1     | 206.3                     | 0.0000  | 84.7                  | 0.0115  | 0.00100 | 100         | 99.66       | 0             | 1         |
| BTF3L4           | 480                     | 316                        | 65.8 | 16015                                | Nku-G-d-59f03.f1     | 221.9                     | 0.0000  | 93.1                  | 0.0104  | 0.00100 | 100         | 99.68       | 0             | 1         |
| ZMYND11          | 1605                    | 354                        | 22.1 | 19182                                | Nku-G-d-62d01.f1     | 285.6                     | 0.0035  | 68.4                  | 0.0645  | 0.05363 | 99.15       | 98.59       | 1             | 4         |
| FEN1             | 1140                    | 381                        | 33.4 | 209082                               | Nku-G-d-45g04.f1     | 271.4                     | 0.0037  | 109.6                 | 0.0585  | 0.06340 | 99.21       | 98.16       | 1             | 6         |
| TMC6 (1 OF 2)    | 1665                    | 467                        | 28.0 | 193204                               | Nku-G-d-02f05.r1     | 357.3                     | 0.0028  | 107.7                 | 0.0393  | 0.07215 | 99.35       | 98.92       | 1             | 4         |
| IRX6A            | 1392                    | 661                        | 47.5 | 177264                               | Nku-G-d-15d05.r1     | 480.9                     | 0.0021  | 179.1                 | 0.0286  | 0.07418 | 99.55       | 99.09       | 1             | 5         |
| EFR3A            | 2460                    | 282                        | 11.5 | 192894                               | Nku-G-d-24b05.r1     | 223.3                     | 0.0094  | 52.7                  | 0.1245  | 0.07533 | 96.77       | 96.77       | 2             | 7         |
| ARHGEF17         | 4413                    | 355                        | 8.0  | 73                                   | Nku-G-d-07g12.r1     | 264.7                     | 0.0038  | 89.3                  | 0.0472  | 0.08115 | 99.15       | 98.59       | 1             | 4         |
| ZNF385C          | 1437                    | 567                        | 39.5 | 178604                               | Nku-G-d-33f09.r1     | 396.1                     | 0.0026  | 170.9                 | 0.0305  | 0.08394 | 99.47       | 98.94       | 1             | 5         |
| IGFN1            | 10053                   | 295                        | 2.9  | 1                                    | Nku-G-d-36h05.f1     | 211.8                     | 0.0048  | 82.2                  | 0.0516  | 0.09382 | 98.98       | 98.3        | 1             | 4         |

| Gene             | length [bp] cds in Nofu | length nt-ali seq1 to seq2 | [%]   | GRZ transcript ID: Nofu_GRZ_cDN A_3_ | Noku genom contig | N = avg no. non-syn sites | dN (Ka) | S = avg no. syn sites | dS (Ks) | dN/dS   | prot_ID [%] | cDNA_ID [%] | # non-syn var | # syn var |
|------------------|-------------------------|----------------------------|-------|--------------------------------------|-------------------|---------------------------|---------|-----------------------|---------|---------|-------------|-------------|---------------|-----------|
| HARS             | 1536                    | 579                        | 37.7  | 181574                               | Nku-G-d-12e07.f1  | 413.8                     | 0.0025  | 165.2                 | 0.0251  | 0.09861 | 99.48       | 99.14       | 1             | 4         |
| MTIF2            | 1992                    | 309                        | 15.5  | 161318                               | Nku-G-d-59b11.r1  | 236.9                     | 0.0043  | 72.1                  | 0.0417  | 0.10392 | 99.03       | 98.71       | 1             | 3         |
| CYP11B2          | 933                     | 524                        | 56.2  | 15769                                | Nku-G-d-37d04.f1  | 391.4                     | 0.0052  | 130.6                 | 0.0484  | 0.10775 | 98.85       | 98.47       | 2             | 6         |
| MLL3 (2 OF 2)    | 11544                   | 609                        | 5.3   | 175423                               | Nku-G-d-61c10.f1  | 453.9                     | 0.0022  | 155.1                 | 0.0198  | 0.11319 | 99.51       | 99.34       | 1             | 3         |
| ZZZ3             | 2883                    | 287                        | 10.0  | 185460                               | Nku-G-d-20d12.f1  | 205.8                     | 0.0051  | 76.2                  | 0.0421  | 0.12168 | 98.94       | 98.58       | 1             | 3         |
| ADAM8A           | 2148                    | 463                        | 21.6  | 208012                               | Nku-G-d-45e07.f1  | 339.4                     | 0.0030  | 122.6                 | 0.0237  | 0.12581 | 99.35       | 99.13       | 1             | 3         |
| KLHL15           | 2115                    | 1,042                      | 49.3  | 13700                                | Nku-G-d-29h08.f1  | 819.1                     | 0.0063  | 221.9                 | 0.0489  | 0.12854 | 98.56       | 98.56       | 5             | 11        |
| LAMB2L           | 6072                    | 523                        | 8.6   | 183309                               | Nku-G-d-63g03.r1  | 413.9                     | 0.0050  | 108.1                 | 0.0368  | 0.13479 | 98.85       | 98.85       | 2             | 4         |
| EARS2            | 1536                    | 621                        | 40.4  | 12266                                | Nku-G-d-57h09.f1  | 391.9                     | 0.0026  | 229.1                 | 0.0180  | 0.14562 | 99.52       | 99.19       | 1             | 4         |
| NFE2L3           | 1917                    | 587                        | 30.6  | 161585                               | Nku-G-d-23a08.r1  | 395.0                     | 0.0052  | 190.0                 | 0.0331  | 0.15721 | 98.97       | 98.63       | 2             | 6         |
| MINK1            | 3786                    | 373                        | 9.9   | 2177                                 | Nku-G-d-31f09.r1  | 261.3                     | 0.0079  | 110.7                 | 0.0473  | 0.16632 | 98.39       | 98.12       | 2             | 5         |
| GTF2H2           | 1176                    | 312                        | 26.5  | 163318                               | Nku-G-d-50d10.f1  | 227.6                     | 0.0045  | 84.4                  | 0.0243  | 0.18343 | 99.04       | 99.04       | 1             | 2         |
| SLC25A30         | 867                     | 211                        | 24.3  | 165726                               | Nku-G-d-48d09.f1  | 153.2                     | 0.0067  | 56.8                  | 0.0362  | 0.18409 | 98.57       | 98.57       | 1             | 2         |
| ACOT11B          | 1725                    | 455                        | 26.4  | 193894                               | Nku-G-d-38d02.r1  | 348.4                     | 0.0058  | 101.6                 | 0.0313  | 0.18465 | 98.01       | 98.68       | 2             | 3         |
| N4BP1            | 2811                    | 817                        | 29.1  | 161462                               | Nku-G-d-34e07.f1  | 640.0                     | 0.0079  | 173.0                 | 0.0425  | 0.18529 | 98.52       | 98.52       | 5             | 7         |
| MBTPS1           | 3210                    | 254                        | 7.9   | 160773                               | Nku-G-d-18b10.f1  | 183.4                     | 0.0056  | 68.6                  | 0.0297  | 0.18873 | 98.81       | 98.81       | 1             | 2         |
| ALG1             | 1383                    | 277                        | 20.0  | 17574                                | Nku-G-d-11f01.r1  | 200.1                     | 0.0051  | 75.9                  | 0.0271  | 0.18948 | 98.91       | 98.91       | 1             | 2         |
| GPR155 (1 OF 2)  | 2421                    | 346                        | 14.3  | 175714                               | Nku-G-d-07d04.f1  | 246.2                     | 0.0042  | 98.8                  | 0.0213  | 0.19468 | 99.13       | 99.13       | 1             | 2         |
| PPFIA2           | 2931                    | 228                        | 7.8   | 7500                                 | Nku-G-d-02g05.r1  | 174.9                     | 0.0118  | 53.1                  | 0.0603  | 0.19576 | 97.37       | 97.81       | 2             | 3         |
| MARK1            | 2385                    | 323                        | 13.5  | 743                                  | Nku-G-d-38e01.r1  | 245.4                     | 0.0082  | 75.6                  | 0.0415  | 0.19706 | 98.13       | 98.44       | 2             | 3         |
| QQQ7C6_ORYLA     | 525                     | 525                        | 100.0 | 178389                               | Nku-G-d-33e08.f1  | 389.4                     | 0.0079  | 132.6                 | 0.0395  | 0.19931 | 98.29       | 98.29       | 3             | 5         |
| ELOVL1B          | 1014                    | 510                        | 50.3  | 178228                               | Nku-G-d-10a08.f1  | 387.8                     | 0.0053  | 122.2                 | 0.0263  | 0.20354 | 98.82       | 99.02       | 2             | 3         |
| CAMTA1 (1 OF 2)  | 2073                    | 488                        | 23.5  | 207535                               | Nku-G-d-38b01.f1  | 325.5                     | 0.0094  | 160.5                 | 0.0456  | 0.20583 | 98.15       | 97.94       | 3             | 7         |
| RAD54L2          | 4440                    | 629                        | 14.2  | 159586                               | Nku-G-d-56e02.f1  | 429.3                     | 0.0024  | 197.7                 | 0.0103  | 0.23179 | 99.52       | 99.52       | 1             | 2         |
| WDR4 (2 OF 2)    | 1164                    | 369                        | 31.7  | 27523                                | Nku-G-d-35h07.f1  | 295.5                     | 0.0034  | 73.5                  | 0.0142  | 0.23795 | 99.19       | 99.46       | 1             | 1         |
| KAT7 (2 OF 2)    | 1878                    | 360                        | 19.2  | 3149                                 | Nku-G-d-29g01.r1  | 267.3                     | 0.0113  | 92.7                  | 0.0460  | 0.24488 | 97.5        | 98.06       | 3             | 4         |
| CR388231         | 2532                    | 424                        | 16.7  | 980                                  | Nku-G-d-12g07.r1  | 284.6                     | 0.0036  | 138.4                 | 0.0146  | 0.24881 | 99.29       | 99.29       | 1             | 2         |
| SQSTM1           | 765                     | 286                        | 37.4  | 8456                                 | Nku-G-d-56d09.r1  | 220.7                     | 0.0090  | 64.3                  | 0.0343  | 0.26344 | 97.89       | 98.6        | 2             | 2         |
| SLC30A9          | 1719                    | 230                        | 13.4  | 160549                               | Nku-G-d-16e09.f1  | 183.7                     | 0.0059  | 44.3                  | 0.0219  | 0.26799 | 98.68       | 99.12       | 1             | 1         |
| GFOD1            | 1176                    | 879                        | 74.7  | 17839                                | Nku-G-d-20f11.f1  | 638.6                     | 0.0159  | 237.4                 | 0.0556  | 0.28533 | 96.58       | 97.49       | 10            | 13        |
| UBAC1            | 1257                    | 211                        | 16.8  | 5031                                 | Nku-G-d-18e01.f1  | 161.0                     | 0.0063  | 49.0                  | 0.0211  | 0.29645 | 98.57       | 99.05       | 1             | 1         |
| ANKRD52 (2 OF 2) | 5802                    | 825                        | 14.2  | 176361                               | Nku-G-d-42d08.f1  | 610.0                     | 0.0033  | 215.0                 | 0.0093  | 0.35721 | 99.27       | 99.52       | 2             | 2         |
| PFKL (2 OF 2)    | 423                     | 171                        | 40.4  | 89104                                | Nku-G-d-37d10.f1  | 124.9                     | 0.0165  | 46.1                  | 0.0458  | 0.36005 | 96.49       | 97.66       | 2             | 2         |
| CCNC             | 849                     | 266                        | 31.3  | 163424                               | Nku-G-d-37e06.f1  | 205.9                     | 0.0000  | 58.1                  | 0.0000  | 0.39739 | 100         | 100         | 0             | 0         |
| SUSD1 (1 OF 2)   | 873                     | 311                        | 35.6  | 8850                                 | Nku-G-d-06g07.f1  | 239.4                     | 0.0126  | 69.6                  | 0.0312  | 0.40540 | 97.09       | 98.38       | 3             | 2         |
| MCM3AP           | 6330                    | 1,043                      | 16.5  | 175677                               | Nku-G-d-50h06.f1  | 725.5                     | 0.0159  | 315.5                 | 0.0388  | 0.40974 | 97.12       | 97.79       | 12            | 12        |
| DSP (2 OF 2)     | 7038                    | 323                        | 4.6   | 192742                               | Nku-G-d-62e07.f1  | 242.9                     | 0.0000  | 78.1                  | 0.0000  | 0.41947 | 100         | 100         | 0             | 0         |
| LMOD1 (2 OF 2)   | 3405                    | 948                        | 27.8  | 159365                               | Nku-G-d-42a11.f1  | 652.7                     | 0.0031  | 295.3                 | 0.0069  | 0.44353 | 99.37       | 99.58       | 2             | 2         |
| STX17            | 876                     | 189                        | 21.6  | 163573                               | Nku-G-d-48a04.f1  | 155.1                     | 0.0000  | 33.9                  | 0.0000  | 0.44456 | 100         | 100         | 0             | 0         |
| HGFA             | 1158                    | 154                        | 13.3  | 9211                                 | Nku-G-d-56g07.r1  | 117.3                     | 0.0000  | 35.7                  | 0.0000  | 0.45730 | 100         | 100         | 0             | 0         |
| EDC4             | 4164                    | 280                        | 6.7   | 193667                               | Nku-G-d-06d08.f1  | 221.7                     | 0.0000  | 57.3                  | 0.0000  | 0.46264 | 100         | 100         | 0             | 0         |
| ATP2B3B          | 2847                    | 229                        | 8.0   | 2708                                 | Nku-G-d-56a06.f1  | 199.2                     | 0.0000  | 28.8                  | 0.0000  | 0.46620 | 100         | 100         | 0             | 0         |
| JMY (2 OF 2)     | 2595                    | 606                        | 23.4  | 175065                               | Nku-G-d-34h03.f1  | 415.9                     | 0.0049  | 190.1                 | 0.0104  | 0.46787 | 99.01       | 99.34       | 2             | 2         |
| CPO              | 1053                    | 209                        | 19.8  | 10194                                | Nku-G-d-03d03.r1  | 142.3                     | 0.0153  | 64.7                  | 0.0321  | 0.47784 | 97.1        | 98.07       | 2             | 2         |
| CARS2            | 1686                    | 295                        | 17.5  | 176993                               | Nku-G-d-51d12.f1  | 192.5                     | 0.0109  | 101.5                 | 0.0208  | 0.52136 | 97.96       | 98.64       | 2             | 2         |

| Gene            | length [bp] cds in Nofu | length nt-ali seq1 to seq2 | [%]       | GRZ transcript ID: Nofu_GRZ_cDN A_3_ | Noku genom contig | N = avg no. non-syn sites | dN (Ka)       | S = avg no. syn sites | dS (Ks)       | dN/dS         | prot_ID [%]  | cDNA_ID [%]  | # non-syn var | # syn var     |
|-----------------|-------------------------|----------------------------|-----------|--------------------------------------|-------------------|---------------------------|---------------|-----------------------|---------------|---------------|--------------|--------------|---------------|---------------|
| SH2D3A          | 1788                    | 382                        | 21.4      | 161217                               | Nku-G-d-04d02.f1  | 295.3                     | 0.0137        | 85.7                  | 0.0246        | 0.55693       | 96.85        | 98.43        | 4             | 2             |
| RAPGEF3         | 2703                    | 367                        | 13.6      | 178504                               | Nku-G-d-19b05.r1  | 283.6                     | 0.0071        | 82.4                  | 0.0127        | 0.55888       | 98.36        | 99.18        | 2             | 1             |
| C2CD3           | 6438                    | 589                        | 9.1       | 768                                  | Nku-G-d-56e04.r1  | 424.9                     | 0.0072        | 163.1                 | 0.0125        | 0.57469       | 98.47        | 99.15        | 3             | 2             |
| FDFT1           | 1251                    | 345                        | 27.6      | 25345                                | Nku-G-d-26e02.f1  | 281.1                     | 0.0110        | 63.9                  | 0.0166        | 0.65881       | 97.39        | 98.84        | 3             | 1             |
| SEMA4G (1 OF 2) | 2622                    | 212                        | 8.1       | 2365                                 | Nku-G-d-29c08.r1  | 157.3                     | 0.0130        | 52.7                  | 0.0197        | 0.65931       | 97.14        | 98.57        | 2             | 1             |
| Sl:CH211-210C8  | 774                     | 558                        | 72.1      | 162668                               | Nku-G-d-05b05.f1  | 413.2                     | 0.0050        | 144.8                 | 0.0072        | 0.68591       | 98.92        | 99.46        | 2             | 1             |
| CAPN5A          | 1911                    | 535                        | 28.0      | 8771                                 | Nku-G-d-01a05.f1  | 427.2                     | 0.0378        | 106.8                 | 0.0545        | 0.69227       | 93.82        | 96.07        | 16            | 6             |
| ZDBF2           | 654                     | 256                        | 39.1      | 59819                                | Nku-G-d-18g01.f1  | 207.2                     | 0.0148        | 47.8                  | 0.0211        | 0.70509       | 96.47        | 98.43        | 3             | 1             |
| TLE4            | 1815                    | 323                        | 17.8      | 26055                                | Nku-G-d-22h05.f1  | 217.2                     | 0.0141        | 103.8                 | 0.0197        | 0.71466       | 97.2         | 98.44        | 3             | 2             |
| SEC24C          | 3576                    | 449                        | 12.6      | 176336                               | Nku-G-d-38e07.f1  | 336.8                     | 0.0092        | 110.2                 | 0.0091        | 1.00503       | 97.99        | 99.11        | 3             | 1             |
| EVC2            | 3825                    | 264                        | 6.9       | 175757                               | Nku-G-d-58g02.f1  | 171.2                     | 0.0126        | 89.8                  | 0.0107        | 1.17755       | 96.59        | 98.48        | 2             | 1             |
| MPHOSPH9        | 3333                    | 267                        | 8.0       | 3343                                 | Nku-G-d-11a06.f1  | 172.1                     | 0.0269        | 94.9                  | 0.0209        | 1.28390       | 95.51        | 97.75        | 5             | 2             |
| CIAPIN1         | 945                     | 249                        | 26.3      | 39469                                | Nku-G-d-47h03.r1  | 174.4                     | 0.0232        | 74.6                  | 0.0142        | 1.63537       | 95.18        | 97.99        | 4             | 1             |
| ATAD5A          | 5187                    | 971                        | 18.7      | 159992                               | Nku-G-d-01b05.f1  | 676.7                     | 0.0090        | 289.3                 | 0.0035        | 2.59650       | 98.14        | 99.28        | 6             | 1             |
| BAIAP2L1A       | 1449                    | 207                        | 14.3      | 160850                               | Nku-G-d-22c01.r1  | 184.3                     | 0.0000        | 22.7                  | 0.0000        | n.a.          | 100          | 100          | 0             | 0             |
| UNC93B1         | 1818                    | 247                        | 13.6      | 194220                               | Nku-G-d-17f12.f1  | 191.8                     | 0.0106        | 54.2                  | 0.0001        | n.a.          | 97.56        | 99.19        | 2             | 0             |
| SF1             | 1770                    | 156                        | 8.8       | 9907                                 | Nku-G-d-06e03.f1  | 122.7                     | 0.0082        | 33.3                  | 0.0001        | n.a.          | 98.08        | 99.36        | 1             | 0             |
| KDM2AA          | 3708                    | 275                        | 7.4       | 175268                               | Nku-G-d-47d07.r1  | 223.6                     | 0.0044        | 49.4                  | 0.0000        | n.a.          | 98.9         | 99.63        | 1             | 0             |
| TBK1            | 2166                    | 302                        | 13.9      | 9307                                 | Nku-G-d-06b06.f1  | 214.0                     | 0.0095        | 86.0                  | 0.0001        | n.a.          | 98           | 99.33        | 2             | 0             |
| LRRC34          | 543                     | 195                        | 35.9      | 72639                                | Nku-G-d-12b01.f1  | 131.8                     | 0.0273        | 63.2                  | 0.0003        | n.a.          | 95.38        | 98.46        | 4             | 0             |
| SERINC1         | 1389                    | 262                        | 18.9      | 33551                                | Nku-G-d-58c11.f1  | 218.5                     | 0.0000        | 42.5                  | 0.0000        | n.a.          | 100          | 100          | 0             | 0             |
| HDX             | 2124                    | 276                        | 13.0      | 193833                               | Nku-G-d-14c07.f1  | 210.1                     | 0.0141        | 65.9                  | 0.0001        | n.a.          | 96.74        | 98.91        | 3             | 0             |
| ANKRD27         | 2676                    | 294                        | 11.0      | 207471                               | Nku-G-d-47b11.r1  | 202.9                     | 0.0052        | 91.1                  | 0.0001        | n.a.          | 98.98        | 99.66        | 1             | 0             |
| MPP4 (2 OF 3)   | 1893                    | 349                        | 18.4      | 177159                               | Nku-G-d-19e05.f1  | 278.7                     | 0.0036        | 69.3                  | 0.0000        | n.a.          | 99.14        | 99.71        | 1             | 0             |
| FRMD1           | 1575                    | 282                        | 17.9      | 161730                               | Nku-G-d-36c11.f1  | 189.1                     | 0.0162        | 92.9                  | 0.0002        | n.a.          | 96.81        | 98.94        | 3             | 0             |
| <b>median</b>   | <b>1,992</b>            | <b>323</b>                 | <b>17</b> |                                      |                   | <b>243</b>                | <b>0.0036</b> | <b>85</b>             | <b>0.0211</b> | <b>0.1317</b> | <b>99.15</b> | <b>99.11</b> | <b>1.0184</b> | <b>2.0567</b> |
| <b>total</b>    | <b>306528</b>           | <b>44710</b>               |           |                                      |                   | <b>32976</b>              |               | <b>11592</b>          |               |               |              |              | <b>177</b>    | <b>298</b>    |
